# Supplementary material
Source: PubMed Central journal article supplement (PMC10614422)
Supplement: NIHMS1536926-supplement-S_M_.pdf [file NIHMS1536926-supplement-S_M_.pdf]

**Appendix B. Identification information for compounds detected in urine.**

| <b>ELUTION ORDER</b> | <b>COMPOUND NAME</b>     | <b>DTXSID</b>                 | <b>PREFERRED_NAME</b> |
|----------------------|--------------------------|-------------------------------|-----------------------|
| 1                    | 1-Propanol               | <a href="#">DTXSID2021739</a> | 1-Propanol            |
| 2                    | 2-Methyl-propanal        | <a href="#">DTXSID9021635</a> | 2-Methylpropanal      |
| 3                    | 2-Butanone               | <a href="#">DTXSID3021516</a> | Methyl ethyl ketone   |
| 4                    | 2-Ethoxy-2-methylpropane | <a href="#">DTXSID0025604</a> | Ethyl T-butyl ether   |
| 5                    | 2-Methyl-1-propanol      | <a href="#">DTXSID0021759</a> | 2-Methyl-1-propanol   |
| 6                    | Amylene Hydrate          | <a href="#">DTXSID0041436</a> | 2-Methyl-2-butanol    |
| 7                    | Isovaleraldehyde         | <a href="#">DTXSID1021619</a> | 3-Methylbutanal       |
| 8                    | 1-Butanol                | <a href="#">DTXSID1021740</a> | 1-Butanol             |
| 9                    | 2-Pentanone              | <a href="#">DTXSID0021888</a> | 2-Pentanone           |
| 10                   | Pentanal                 | <a href="#">DTXSID7021653</a> | Pentanal              |
| 11                   | 3-Methyl-1-butanol       | <a href="#">DTXSID3025469</a> | Isopentyl alcohol     |
| 12                   | 4-Methyl-2-pentanone     | <a href="#">DTXSID5021889</a> | 4-Methyl-2-pentanone  |
| 13                   | Dimethyl disulfide       | <a href="#">DTXSID4025117</a> | Methyl disulfide      |
| 14                   | 3-Methyl-3-pentanol      | <a href="#">DTXSID0021755</a> | 3-Methyl-3-pentanol   |
| 15                   | Pyrrrole                 | <a href="#">DTXSID5021910</a> | Pyrrrole              |
| 16                   | 4-Methyl-2-pentanol      | <a href="#">DTXSID2026781</a> | 4-Methyl-2-pentanol   |
| 17                   | 1-Pentanol               | <a href="#">DTXSID6021741</a> | 1-Pentanol            |
| 18                   | Hexanal                  | <a href="#">DTXSID2021604</a> | Hexanal               |
| 19                   | Furfural                 | <a href="#">DTXSID1020647</a> | Furfural              |
| 20                   | 2-Ethyl-1-butanol        | <a href="#">DTXSID2041416</a> | 2-Ethyl-1-butanol     |
| 21                   | 1-Hexanol                | <a href="#">DTXSID8021931</a> | 1-Hexanol             |
| 22                   | 4-Heptanone              | <a href="#">DTXSID6047650</a> | 4-Heptanone           |
| 23                   | Allyl isothiocyanate     | <a href="#">DTXSID3020047</a> | Allyl isothiocyanate  |
| 24                   | Heptanal                 | <a href="#">DTXSID0021597</a> | Heptanal              |
| 25                   | 1-Heptanol               | <a href="#">DTXSID8021937</a> | 1-Heptanol            |
| 26                   | Benzaldehyde             | <a href="#">DTXSID8039241</a> | Benzaldehyde          |
| 27                   | Octanal                  | <a href="#">DTXSID3021643</a> | Octanal               |
| 28                   | Carvone                  | <a href="#">DTXSID8047426</a> | dl-Carvone            |

| <b>EPA CHEMISTRY<br/>DASHBOARD INPUT</b> | <b>FOUND_BY</b>           | <b>RETENTION TIME (min)</b> | <b>SIM ION (amu)</b> |
|------------------------------------------|---------------------------|-----------------------------|----------------------|
| 1-Propanol                               | Approved Name             | 5.016                       | 59                   |
| 2-Methyl-propanal                        | Synonym                   | 5.042                       | 72                   |
| 2-Butanone                               | Expert Validated Synonym  | 5.427                       | 72                   |
| 2-Ethoxy-2-methylpropane                 | Synonym from Valid Source | 5.756                       | 59                   |
| 2-Methyl-1-propanol                      | Approved Name             | 5.809                       | 43                   |
| Amylene Hydrate                          | Synonym from Valid Source | 6.001                       | 59                   |
| Isovaleraldehyde                         | Expert Validated Synonym  | 6.245                       | 44                   |
| 1-Butanol                                | Approved Name             | 6.351                       | 56                   |
| 2-Pentanone                              | Approved Name             | 6.766                       | 43                   |
| Pentanal                                 | Approved Name             | 6.939                       | 44                   |
| 3-Methyl-1-butanol                       | Synonym from Valid Source | 7.642                       | 55                   |
| 4-Methyl-2-pentanone                     | Approved Name             | 7.759                       | 43                   |
| Dimethyl disulfide                       | Synonym from Valid Source | 7.957                       | 94                   |
| 3-Methyl-3-pentanol                      | Approved Name             | 8.01                        | 73                   |
| Pyrrole                                  | Approved Name             | 8.071                       | 67                   |
| 4-Methyl-2-pentanol                      | Approved Name             | 8.106                       | 45                   |
| 1-Pentanol                               | Approved Name             | 8.274                       | 42                   |
| Hexanal                                  | Approved Name             | 8.986                       | 56                   |
| Furfural                                 | Approved Name             | 9.742                       | 96                   |
| 2-Ethyl-1-butanol                        | Approved Name             | 9.837                       | 43                   |
| 1-Hexanol                                | Approved Name             | 10.42                       | 56                   |
| 4-Heptanone                              | Approved Name             | 10.54                       | 71                   |
| Allyl isothiocyanate                     | Approved Name             | 10.824                      | 99                   |
| Heptanal                                 | Approved Name             | 11.145                      | 70                   |
| 1-Heptanol                               | Approved Name             | 12.501                      | 70                   |
| Benzaldehyde                             | Approved Name             | 12.527                      | 106                  |
| Octanal                                  | Approved Name             | 13.205                      | 43                   |
| Carvone                                  | Synonym from Valid Source | 17.76                       | 82                   |

| CONFIRMATION IONS<br>(amu) | R <sup>2</sup> |
|----------------------------|----------------|
| 31, 42                     | 0.993          |
| 43                         | 0.989          |
| 43, 39                     | 0.998          |
| 87                         | 0.994          |
| 33                         | 0.994          |
| 73                         | 0.991          |
| 58                         | 0.995          |
| 41                         | 0.995          |
| 86                         | 0.989          |
| 58                         | 0.993          |
| 7                          | 0.997          |
| 58, 100                    | 0.997          |
| 79                         | 0.987          |
| 55                         | 0.994          |
| 39                         | 0.992          |
| 69                         | 0.993          |
| 55                         | 0.988          |
| 72                         | 0.987          |
| 95                         | 0.99           |
| 70                         | 0.984          |
| 43, 69                     | 0.984          |
| 114                        | 0.999          |
| 39                         | 0.996          |
| 43                         | 0.999          |
| 56                         | 0.992          |
| 105                        | 0.997          |
| 57                         | 0.996          |
| 54                         | 0.983          |

==

—
